# Supplementary material for: Stratus Not Altocumulus: A New View of the Yeast Protein Interaction Network
Source: PLOS journal article supplement (doi:10.1371/journal.pbio.0040317), 2006-09-15
Supplement: S1 (10.1371/journal.pbio.0040317.s001) [file journal.pbio.0040317.s001]

# Supporting Information for

## Stratus not altocumulus: a new view of the yeast protein interaction network

Nizar N. Batada<sup>1</sup>, Teresa Reguly, Ashton Breitkreutz, Lorrie Boucher, Bobby-Joe Breitkreutz, Laurence Hurst<sup>3</sup> and Mike Tyers<sup>1,2</sup>

<sup>1</sup> *Samuel Lunenfeld Research Institute, Mount Sinai Hospital, 600 University Ave, Toronto, Canada M5G 1X5*

<sup>2</sup> *Department of Medical Genetics and Microbiology, University of Toronto, Toronto, Canada M5S 1A8*

<sup>3</sup> *Department of Biology and Biochemistry, University of Bath, Bath, UK, BA2 0TA*

### Supplementary Table

#### Supplementary Table 1: Fraction of interactions with shared GO annotation.

Shared annotation for interacting pairs in the FYI [1] and the full HC network were calculated. Statistical significance of differences in the fraction of shared annotation between FYI and HC were computed using Fisher's Exact Test ( $P < 0.01$ ). Only those interactions are considered in which both protein partners have a known GO annotation.

|                       | GO<br>Function | GO<br>Process | GO<br>Component |
|-----------------------|----------------|---------------|-----------------|
| <b>FYI</b>            | 0.62           | 0.67          | 0.63            |
| <b>HC</b>             | 0.43           | 0.43          | 0.49            |
| <b>HC<sup>h</sup></b> | 0.52           | 0.50          | 0.52            |
| <b>HC<sup>m</sup></b> | 0.49           | 0.48          | 0.55            |
| <b>LC</b>             | 0.37           | 0.36          | 0.46            |
